# Male sex pheromone components in *Heliconius* butterflies released by the androconia affect female choice

Kathy Darragh<sup>1,2\*</sup>, Sohini Vanjari<sup>1,2\*</sup>, Florian Mann<sup>3\*</sup>, Maria F Gonzalez-R<sup>4\*</sup> Colin R Morrison<sup>2,5</sup>, Camilo Salazar<sup>4</sup>, Carolina Pardo-Diaz<sup>4</sup>, Richard M Merrill<sup>1,2,6</sup>, W Owen McMillan<sup>2</sup>, Stefan Schulz<sup>3</sup>, Chris D. Jiggins<sup>1,2†</sup>

<sup>1</sup>Department of Zoology, University of Cambridge, Cambridge, Cambridgeshire, United Kingdom

<sup>2</sup>Smithsonian Tropical Research Institute, Panama, Panama

<sup>3</sup>Institute of Organic Chemistry, Technische Universität Braunschweig, Braunschweig, Germany

<sup>4</sup>Biology Program, Faculty of Natural Sciences and Mathematics, Universidad del Rosario, Bogota, Colombia

<sup>5</sup>Department of Integrative Biology, University of Texas at Austin, Austin, Texas, United States

<sup>6</sup>Division of Evolutionary Biology, Faculty of Biology, Ludwig-Maximilians-Universität München, Munich, Germany

\*These authors contributed equally to this work

†Corresponding author: [c.jiggins@zoo.cam.ac.uk](mailto:c.jiggins@zoo.cam.ac.uk)

## Abstract

Sex specific pheromones are known to play an important role in butterfly courtship, and may influence both individual reproductive success and reproductive isolation between species. Extensive ecological, behavioural and genetic studies of *Heliconius* butterflies have made a substantial contribution to our understanding of speciation. Male pheromones, although long suspected to play an important role, have received relatively little attention in this genus. Here, we combine morphological, chemical, and behavioural analyses of male pheromones in the Neotropical butterfly *Heliconius melpomene*. First, we identify putative androconia that are specialized brush-like scales that lie within the shiny grey region of the male hindwing. We then describe putative male sex pheromone compounds, which are largely confined to the androconial region of the hindwing of mature males, but are absent in immature males and females. Finally, behavioural choice experiments reveal that females of *H. melpomene*, *H. erato* and *H. timareta* strongly discriminate against conspecific males which have their androconial region experimentally blocked. As well as demonstrating the importance of chemical signalling for female mate choice in *Heliconius* butterflies, the results describe structures involved in release of the pheromone and a list of potential male sex pheromone compounds.

Key words: *Heliconius*, pheromone, sexual selection, mate choice, androconia, Lepidoptera, reproductive isolation.

## Introduction

Sex pheromones are species-specific blends of chemical compounds that mediate intraspecific communication between males and females (Wyatt, 2003, 2014). Among insects, pheromone communication can involve a single chemical, but often relies on a complex combination of multiple chemical components (Grillet, Dartevelle & Ferveur, 2006; Nieberding et al., 2008; Symonds, Johnson & Elgar, 2012). This chemical complexity provides the potential to convey sophisticated information, such as the inbreeding status of the emitter (Ando, Inomata & Yamamoto, 2004; van Bergen et al., 2013; Menzel, Radke & Foitzik, 2016), mate quality (Dussourd et al., 1991; Ruther et al., 2009), and species identity (Danci et al., 2006; Saveer et al., 2014). Perhaps the best studied insect sex pheromones are those produced by female moths to attract mating partners, often over long distances (Löfstedt, 1993; Smadja & Butlin, 2008). However, male insects also produce sex pheromones (Eggert & Müller, 1997; Kock, Ruther & Sauer, 2007; Ruther et al., 2009; Meinwald, Meinwald & Mazzocchi, 1969), and chemical signalling can occur over short distances (Nishida et al., 1996; Mas & Jallon, 2005; Smadja & Butlin, 2008; Wicker-Thomas, 2011; Grillet et al., 2012).

Sex pheromones can play a key role in determining the reproductive success of individuals within a species, and may also result in reproductive isolation between species if signals diverge (Johansson & Jones, 2007; Smadja & Butlin, 2008; Wyatt, 2014). Within Lepidoptera, the importance of chemical signalling in mate choice and speciation is well established among moth species (Phelan & Baker, 1987; Löfstedt, 1993; Bethenod et al., 2004; Dopman, Robbins & Seaman, 2010; Lassance et al., 2010; Saveer et al., 2014). Most moths fly at night, when visual signalling is unlikely to be as effective in attracting mates. In contrast, butterflies are mostly diurnal and visual signals are usually important for initial mate attraction (Vane-Wright & Boppré, 1993). However, chemical signals can play other roles in butterfly mate choice, with evidence that close-range courtship interactions often involve pheromones emitted by males, in contrast to the long-distance signalling with female-emitted pheromones more commonly observed in moths (Vane-Wright & Boppré, 1993). Acceptance behaviour in the queen butterfly *Danaus berenice*, for example, is regulated by a dihydropyrrolizine alkaloid released by the male during courtship (Brower & Jones, 1965; Meinwald, Meinwald & Mazzocchi, 1969; Pliske & Eisner, 1969). Another danaine butterfly, *Idea leuconoe*, displays brush-like structures, called 'hair-pencils', emitting a mixture of volatiles during courtship,

which when applied to dummy males elicits an acceptance posture in females (Nishida et al., 1996). *Pieris rapae* and *P. brassicae* both use macrocyclic lactones as a pheromone to induce acceptance in females (Yildizhan et al., 2009). Finally, in *Bicyclus anynana* males with reduced amounts of male sex pheromone have decreased mating success, implying a direct involvement in reproductive fitness (Nieberding et al., 2008, 2012).

Here we focus on the potential role of male pheromones in *Heliconius* butterflies. *Heliconius* is a diverse Neotropical genus, which has been extensively studied in the context of adaptation and speciation (Jiggins, 2008; Supple et al., 2014; Merrill et al., 2015). These butterflies are well known for Müllerian mimicry, in which unrelated species converge on the same warning signal to more efficiently advertise their unpalatability to predators. Closely related *Heliconius* taxa, however, often differ in colour pattern and divergent selection acting on warning patterns is believed to play an important role in speciation (Bates, 1862; Jiggins et al., 2001; Merrill et al., 2011b).

Male *Heliconius* display conspicuous courtship behaviours likely because the availability of receptive females in nature is limited. Female re-mating is a rare event in *Heliconius* (Walters et al., 2012) and males must compete to find virgin females within a visually complex environment (Merrill et al., 2015). In addition, males donate a nutrient-rich spermatophore during mating (Boggs & Gilbert, 1979; Boggs, 1981) which, together with costs associated with extended copulation, will select for discrimination against less suitable mates in both sexes. Crane (Crane, 1955) demonstrated that a combination of colour (hue) and movement stimulates courtship by *Heliconius* males. More recently, it has repeatedly been shown across multiple *Heliconius* species that males are more attracted to their own warning pattern than that of closely related taxa (Jiggins et al., 2001; Jiggins, Estrada & Rodrigues, 2004; Kronforst et al., 2006; Melo et al., 2009; Muñoz et al., 2010; Merrill et al., 2011a,b; Merrill, Chia & Nadeau, 2014; Finkbeiner, Briscoe & Reed, 2014; Sánchez et al., 2015).

In addition to colour pattern, male *Heliconius* also use chemical signals to locate and determine the suitability of potential mates. This includes the use of green leaf volatiles during mate searching. Six-carbon alcohols and acetates are released by host plants in larger amounts after leaf tissue damage caused by caterpillars, which adult males of the pupal mating species *H. charithonia* then use to find potential mates (Estrada & Gilbert, 2010). Once males find pupae they also use chemical cues to determine sex (Estrada et al., 2010). Supporting a further role for

chemical signals, *Heliconius erato* males distinguish between wings dissected from conspecific and local *H. melpomene* females that are virtually identical in wing pattern, but this effect disappears after wings have been washed in hexane (Estrada & Jiggins, 2008).

As well as attraction, chemicals can also be involved in repulsion. Males are repelled by a strong odour released by previously mated females (Gilbert, 1976). This ‘anti-aphrodisiac’ is produced by males soon after eclosion and is then transferred during copulation (Schulz et al., 2008). The abdominal glands of male *H. melpomene*, for example, contain a complex chemical bouquet consisting of the volatile compound (*E*)- $\beta$ -ocimene together with some trace components and esters of common C<sub>16</sub> – and C<sub>18</sub> – fatty acids with alcohols, where  $\beta$ -ocimene acts as the main antiaphrodisiac component (Schulz et al., 2008). This antiaphrodisiac effect occurs in several *Heliconius* species, which show species-specific patterns of scent gland constituents (Gilbert, 1976; Estrada et al., 2011).

Despite the focus on male mate choice, analysis of courtship in *Heliconius* has shown that females can exhibit rejection behaviours, such as raising their abdomen and flattening their wings (Mallet, 1986; Klein & Araújo, 2010). There are also a number of observations that indicate a role for chemical recognition in mate choice. *Heliconius erato* males separate their wings during courtship to reveal the silvery overlap region, suggested to be involved in the distribution of pheromones. This behaviour, described as androconial exposition, occurs in every courtship that results in mating, suggesting that pheromones influence the female response (Klein & Araújo, 2010). Additionally, direct evidence that *Heliconius* females use chemical signals to distinguish conspecific males comes from studies of the closely related species *H. timareta* and *H. melpomene*, which share the same warning patterns in Peru (Mérot et al., 2015). Males experimentally treated with abdominal scent glands and wing extracts of heterospecifics show a reduced probability of mating. Chemical analysis of both abdominal glands and whole wings provides evidence for qualitative and quantitative differences in the chemical signatures between these closely related species (Mérot et al., 2015).

Here, we investigate the role of chemical signalling in female mate choice in *Heliconius* at three levels. First, we investigate morphological structures potentially associated with pheromone production. In butterflies, a variety of species-specific structures including brushes, fans, and differentiated scales on wings, legs or abdomen are used to expose pheromones produced in associated glands (Wyatt, 2003; Nieberding et al., 2008). In particular, male-specific

scent glands, termed androconia, are common across the Lepidoptera. In male *Heliconius*, a patch of shiny grey scales is present on the overlapping region of the hind and forewing (Fig. 1). The observed sexual dimorphism in this trait suggests that these are androconia, and may be associated with a male sex pheromone (Emsley, 1963). Furthermore, earlier authors have identified brush-like scales in this region that are the putative site for pheromone production and emission (Müller, 1912; Barth, 1952). Here we investigate the structure of these scales using scanning electron microscopy. Second, we complement recently published chemical analysis of whole *H. melpomene* wings (Mérot et al., 2015) by dissecting wing regions to identify those associated with the production of compounds and identify the potential male sex pheromone compounds isolated from this region. Finally, we carry out mate choice experiments in *H. melpomene rosina*, *H. melpomene malleti*, *H. timareta florenci* and *H. erato demophoon* to test the importance of pheromones for female choice.

## Methods

Individuals used for morphological and chemical analyses were from an outbred stock of *Heliconius melpomene plesseni* and *Heliconius melpomene malleti* (sold as *H. m. aglaope*), maintained at the University of Cambridge insectaries (Fig. 1A). These two races are from the region of a hybrid zone in the eastern Andes of Ecuador, and showed considerable inter-racial hybridization in the stocks, so are treated here as a single population and referred to as the Ecuador samples. These stocks were established from individuals obtained from a commercial breeder (Stratford-Upon-Avon Butterfly Farm, Swans Nest, Stratford-Upon-Avon, CV37 7LS, UK: [www.butterflyfarm.co.uk](http://www.butterflyfarm.co.uk)). Laboratory stocks were maintained on the larval food plants, *Passiflora menispermifolia* and *P. biflora*. Adult butterflies were fed on ~10% sucrose solution mixed with an amino acid supplement (Critical Care Formula<sup>®</sup>, Vetark Professional, Winchester, UK). Further chemical and behavioural analysis were carried out on the mimetic but distantly related *H. melpomene rosina* and *H. erato demophoon* reared at the Smithsonian Tropical Research Institute (STRI) facilities in Gamboa, Panama, and are referred to as the Panama samples. Both males and females of the Panama samples were from outbred stocks established from wild individuals collected in Gamboa (9°7.4' N, 79°42.2' W, elevation 60 m) within the nearby Soberania National Park, and San Lorenzo National Park (9°17'N, 79°58'W; elevation 130 m). Larvae were reared on *Passiflora williamsi* and *P. biflora*. Adult butterflies were provided with ~20% sugar solution with *Psychotria* sp., *Gurania* sp., and *Psiguria* sp. as pollen

sources. Finally, behavioural experiments were carried out in the mimetic and closely related species *Heliconius melpomene malleti* and *H. timareta florenci* reared at the insectaries of Universidad del Rosario (UR) in La Vega, Colombia. These stocks derived from wild caught individuals from Sucre, Caqueta (01°48'12" N, 75°39'19"W, elevation 1200 m). Larvae were reared on *Passiflora oerstedii* and adults were provided with *Psiguria sp.* as pollen source and ~20% sugar solution.

### *Morphological analysis*

The detailed morphology of androconial scales was determined using a Field Emission Scanning Electron Microscope. Three males and two females of *H. melpomene* from Ecuador were used for this analysis. The androconial grey scale region was dissected out from both hind and forewings and attached to aluminium stubs with carbon tabs and subsequently coated with 20nm of gold using a Quorum/Emitech sputter coater. The gold-coated androconia were then viewed in an FEI XL30 FEGSEM operated at 5kV. Images were recorded digitally using XL30 software at 500x magnification.



# *Characterization of potential male sex pheromone*

Wing tissue from ten males (five newly emerged and five 10-day old) and five females (10-day old) from the Ecuador stock was collected between November 2011 and March 2012 for chemical analysis. Wings were dissected into four parts: forewing androconia, hindwing androconia, forewing non-androconia and hindwing non-androconia. The ‘androconia’ regions corresponded to the grey-brown region (Fig. 1B and C), with non-androconia corresponding to the remaining portion of the wing. In females, a region corresponding in size and extent to the grey-brown region seen in males was dissected. The dissected sections were then immediately placed in 200µl hexane or dichloromethane in 2 mL glass vials and allowed to soak for three hours. Initial analysis showed no major differences in extracted chemicals between hexane and dichloromethane extracts (data not shown). Therefore, the more polar dichloromethane was used in later analyses. Due to a larger available stock of *H. melpomene rosina* for behavioural experiments, androconial tissue was also then collected from 20 males and 11 females (both 10-12 days old) in Panama between February and July 2016. The tissue was soaked in 200µl dichloromethane in 2ml glass vials, with PTFE-coated caps, for one hour. The extraction time was shortened as this had no influence on the results (data not shown). The solvent was then transferred to new vials and stored at -20°C. Samples were evaporated under ambient conditions at room temperature prior to analysis.

Mature male androconial extracts from the Ecuador stock were analysed by gas chromatography/mass spectrometry (GC/MS) using a Hewlett-Packard model 5975 mass-selective detector connected to a Hewlett-Packard GC model 7890A, and equipped with a Hewlett-Packard ALS 7683B autosampler. All other Ecuador extracts were analysed by comparison to the male androconial results. Extracts from the Panama stock were analysed by GC/MS using a Hewlett-Packard model 5977 mass-selective detector connected to a Hewlett-Packard GC model 7890B, and equipped with a Hewlett-Packard ALS 7693 autosampler. HP-5MS fused silica capillary columns (Agilent, 30 m × 0.25 mm, 0.25 µm) were used in both GCs. In both cases, injection was performed in splitless mode (250°C injector temperature) with helium as the carrier gas (constant flow of 1.2 ml/min). The temperature programme started at 50°C, was held for 5 min, and then rose at a rate of 5°C/min to 320°C, before being held at 320°C for 5 minutes. Components were identified by comparison of mass spectra and gas chromatographic Kovats retention index with those of authentic reference samples and also by



analysis of mass spectra. The double bond positions of unsaturated compounds were determined by derivatisation with dimethyl disulfide (Buser et al., 1983). To confirm chemical structures, alcohols were synthesised from the corresponding methyl esters by reduction according to established procedures (Becker & Beckert, 1993, p. 570). The aldehydes were synthesised by oxidation of the respective alcohols (More & Finney, 2002).

Compounds found in the extracts were quantified using gas chromatography with flame ionisation detection with a Hewlett-Packard GC model 7890A or 7890B equipped with a Hewlett-Packard ALS 7683B (Ecuador) or 7693 (Panama) autosampler. A BPX-5 fused silica capillary column (SGE, 25 m × 0.22 mm, 0.25 µm) was used in both cases. Injection was performed in splitless mode (250°C injector temperature) with hydrogen as the carrier gas (constant flow of 1.65 ml/min). The temperature programme started at 50°C, held for 5 min, and then rose to 320°C with a heating rate of 5°C/min. Pentadecyl acetate (10.1 ng) or (Z)-4-tridecenyl acetate (1 ng) were used as internal standard for Ecuador samples, and 2-tetradecylacetate (200ng) for Panama samples. Only compounds eluting earlier than hexacosane were considered for analysis. Later compounds were identified as cuticular hydrocarbons, 2,5-dialkyltetrahydrofurans, cholesterol and artefacts (*e.g.* phthalates or adipates). The variability in the late eluting cuticular hydrocarbons was low and did not show characteristic differences between samples.

For the Ecuador samples, groups were visualised as boxplots, due to the high frequency of absent compounds in the samples. We then used non-parametric Kruskal-Wallis to test for differences between the amounts of compounds present in different wing regions of mature males, and also between age and sex categories. This was followed up by Dunn post-hoc testing (Dinno, 2017; Ogle, 2017), with Bonferroni correction.

For the Panama samples, due to the higher sample size, and larger number of compounds identified we visualised the males and females as two groups using a non-metric multidimensional scaling (NMDS ordination, based on a Bray-curtis similarity matrix. We used the metaMDS function in the package vegan (Oksanen et al., 2017), with visualisation using the package ade4 (Dray & Dufour, 2007). This was followed up with ANOSIM to compare differences between groups, and non-parametric Kruskal-Wallis tests to determine which compounds differed between sexes.

## Behavioural experiments

To test female acceptance of male pheromones, behavioural experiments were conducted in insectaries at STRI, Gamboa, Panama between February and July 2016, and also in insectaries at UR in La Vega, Colombia between November 2015 and June 2016. One day old virgin females were presented with a control male and a ‘pheromone blocked’ male, both of which were at least ten days old. Males from Panama were treated with transparent nail varnish (Revlon Liquid Quick Dry containing cyclomethicone, isopropyl alcohol, ethylhexyl palmitate, mineral oil and fragrance) applied to wings, following Constanzo and Monteiro (Constanzo & Monteiro, 2007). Males from Colombia were treated with transparent nail varnish (Vogue Fantastic). Pheromone blocked males had the dorsal side of their hindwing androconia blocked, whilst control males had the same region on the ventral side of the wing blocked.

Males were randomly marked using a black Sharpie marker with an ‘x’ on either their left or right wing for identification purposes during the experiment. In Panama, experiments began at 8.30am and males were left in the cage until 3pm. During mating, *Heliconius* pairs invariably remain connected for at least an hour and so observations were made every hour to check for matings. If no mating occurred on the first day, this was repeated the next day with the same butterflies. Behavioural observations were recorded for 17 trials with *H. erato demophon* and 31 trials with *H. melpomene rosina* for the first two hours of the experiment on day one. Observations were divided into one minute intervals, during which both female and male behaviours were recorded. In Colombia, experiments were conducted from 7am to 1pm, checking every 30 minutes for matings. As before, if no mating occurred on the first day, the experiment was repeated the next day with the same butterflies. Female behavioural observations were recorded for 17 trials with *H. timareta florenci* and 18 trials with *H. melpomene malleti* for the first two hours of the experiment on day one. Observations were divided into one minute intervals and were recorded only when a male was actively courting the female. Four female rejection behaviours were recorded: ‘Flutter’ refers to when a female has her abdomen raised and quickly flaps her wings; ‘Wings open’ refers to when the female is alighted with wings open and abdomen raised but without wing fluttering; ‘Abdomen up’ refers to when the female is alighted with wings closed and abdomen concealed within the wings; ‘Fly away’ refers to when the female flies away from the male. Male courtships, defined as hovering over the female, were recorded. Mating outcome results were analysed with binomial tests. We used generalized linear

271 mixed models (GLMMs) with a binomial error distribution and logit link function to test whether  
 272 females respond differently to control and experimental males. The response variable was  
 273 derived from trial minutes in which males courted where females performed a particular  
 274 behaviour ('success') or did not ('failure'). Significance was determined with likelihood ratio  
 275 tests comparing models with and without male type included as an explanatory variable.  
 276 Individual female was included as a random effect in all models to avoid pseudoreplication. All  
 277 statistical analyses were performed with *R* version 3.3.1 (R Core Team, 2016), along with the  
 278 packages ggplot2 (Wickham, 2009), car (Fox & Weisberg, 2011) and binom (Dorai-Raj, 2014).  
 279  
 280

## Results

### *Morphological analysis*

We identified a marked sexual dimorphism in scale structure (Fig. 2). In the central region of the male hindwing androconia along vein Sc+R<sub>1</sub> we identified specialised scales (Fig. 2A), which were absent in females and in the forewing androconia of males (Fig. 2B, 2C). These scales had brush-like structures at their distal end (Fig. 2D), and were not detected in any other wing region examined. The brush-like scales were found in alternating rows with scales with a normal structure. Moving away from the Sc+R<sub>1</sub> wing vein, the density and width of these scales decreased, with isolated brush-like scales found completely surrounded by normal scales. In addition, the base of these brush-like scales was more swollen and glandular as compared to other scales (Fig. 3).

### *Characterization of potential male sex pheromone*

We initially investigated candidate wing pheromone composition using a stock of butterflies from Ecuador. By use of GC/MS and synthesis, six compounds were consistently found in the male wing extracts from these samples (Fig. 4) that were identified as the aldehydes (Z)-9-octadecenal, octadecanal, (Z)-11-icosenal, icosanal, and (Z)-13-docosenal and the alkane henicosane (C<sub>21</sub>).

Firstly, a comparison of different wing regions of 10-day old males was carried out (Fig. 5A). Henicosane was found in all regions of the wing and was not considered in further analysis. The amount of (Z)-9-octadecenal was not significantly different between area categories. Octadecanal, (Z)-11-icosenal, icosanal and (Z)-13-docosenal showed significant differences between wing areas. Post-hoc testing found that these four compounds were significantly more abundant in the hindwing androconia than the rest of the forewing and hindwing, but not the forewing androconia (see Table S1 for statistical details).

Secondly, the hindwing androconia of old males, old females, and young males were compared (Fig. 5B). With the exception of henicosane, the other compounds were observed to be age-specific and sex-specific. (Z)-9-octadecenal was found more in old males than young males or old females but this was not statistically significant. In contrast, octadecanal, (Z)-11-icosenal, icosanal and (Z)-13-docosenal showed significant differences between age and sex categories.

Post-hoc testing found that these compounds were all present in significantly greater amounts in old males than young males or old females (See Table S2 for statistical details).

As stocks of *H. melpomene rosina* from Panama were available for behavioural assays, we then investigated the chemical composition of this population, using a larger sample size. These Panama samples showed some similarities to the Ecuadorean samples, although they contained more compounds and in higher amounts (Fig. 4; Fig. S1 and Table S3). Females and males grouped separately with NMDS visualisation, and these groups were significantly different (Fig. S1). In this larger dataset, (Z)-9-octadecenal, octadecanal, (Z)-11-icosenal, icosanal, (Z)-13-docosenal and heneicosane were all found in significantly larger amounts in old males than old females, along with many other compounds (Ta. S3). Small amounts of nonadecanal, methyl-branched octadecanals and their respective alcohols occurred that had not been detected in the Ecuador samples, potentially due to the difference in equipment sensitivity, genuine geographic variation, or the fact that the Ecuadorean butterflies have spent more generations in captivity. Additionally, syringaldehyde was present, which was not detected in the Ecuador samples.

### *Behavioural experiments*

In our mate choice trials, females of all four species/races discriminated against conspecific males in which pheromone transmission was experimentally blocked (Table 1). Across all four taxa tested, only seven of 71 matings (9.8%) were with the pheromone blocked male, with the remaining 64 matings (90%) being with the control (unblocked) males. This was not due to altered male courtship attempts as control and experimental males courted equally in three out of four species (Fig. S2). In experiments with *H. timareta florenciae*, the control males courted more than experimental males (Fig. S2).

We observed no consistent significant differences in female behavioural responses towards control and experimental males (Fig. S3). Some female behaviours were observed more often towards experimental males in experiments with *H. melpomene malleti* and *H. timareta florenciae* (Fig. S3). In particular, *H. melpomene malleti* females were more likely to open their wings towards experimental males ( $2\Delta\ln L=17.093$ , d.f.=1,  $p<0.001$ ), fly away ( $2\Delta\ln L= 8.0356$ , d.f.=1,  $p<0.01$ ) and also flutter ( $2\Delta\ln L= 15.823$ , d.f.=1,  $p<0.001$ ). Similarly, *H. timareta florenciae* females were also more likely to open their wings towards experimental males ( $2\Delta\ln L= 22.909$ , d.f.=1,  $p<0.001$ ), fly away ( $2\Delta\ln L= 6.1368$ , d.f.=1,  $p<0.001$ ), and flutter ( $2\Delta\ln L=$

26.037, d.f.=1,  $p < 0.001$ ). However, despite these differences, these behavioural responses were not consistently observed across the four species/races tested. Some of these results are driven by just a few individual females, with differences in behaviour no longer significant when they are removed. Furthermore, although some significant female behavioural responses were seen for *H. melpomene malleti* in Colombia, no corresponding difference was found for *H. melpomene rosina* in Panama, where a larger number of courtships were observed, so caution should be taken when interpreting these results.

## Discussion

Visual cues are known to be important for mate finding and courtship behaviours by male *Heliconius* butterflies, with implications for reproductive isolation and speciation (Merrill et al., 2015). Here, we have shown that female choice based on chemical signalling is also important for reproduction. We have identified compounds associated with sexually mature male wings and described morphological structures putatively involved in pheromone release. Furthermore, we have shown that chemical signalling is involved in mating in *Heliconius*, with females from three different species across four races showing strong discrimination against males which have had their androconia experimentally blocked.

Our results are broadly comparable with another recent analysis of wing compounds in *Heliconius* (Mérot et al., 2015), although the previous study did not compare different wing regions, or males and females of the same age. As the previous study also did not use synthesis to identify compounds, our work is highly complementary and extends their results to confirm region- and age-specific localization of compounds to older male androconia. Male *Heliconius* do not become sexually active until several days after eclosion, so the absence of these compounds from females and younger males is strongly suggestive of a role in mating behaviour. The compounds are unlikely to be obtained from direct sequestration of compounds from larval host plants as they are not present in young males or in older females. This suggests that there could be genetic control of the production of these compounds, and so they have the potential to play a role in reproductive isolation between species.

The restriction of these five putative male sex pheromones, (Z)-9-octadecenal, octadecanal, (Z)-11-icosenal, icosanal, and (Z)-13-docosenal, to the hindwing androconia of mature males (Fig. 5A) suggests that pheromone storage or production is restricted to the

hindwing. This is supported by the scanning electron microscope images which show special brush-like scales in the androconial region (Fig. 2A), located primarily around and along the hindwing vein Sc+R<sub>1</sub>, similar to the depiction in Figure 73 of Emsley's previous morphological analysis (Emsley, 1963). Similar scales have been described from light microscopy in other *Heliconius* species, but not previously in *H. melpomene* (Müller, 1912; Barth, 1952). The base of these special brush-like scales was more swollen and glandular as compared to other scales (Fig. 3), perhaps indicating a role in storage or production of pheromones by these scales. Trace amounts of chemicals on the forewing androconia may be due to contact in the overlapping portion of the fore- and hindwings, and both wings may play a role in dispersal of the compounds during courtship.

Samples from Panama showed both a greater diversity and amounts of compounds (Fig. S1 and Table S3). This might reflect an issue with inbreeding in the Ecuador population because they were obtained from a commercial breeder, or technical differences between the two locations where the analysis was performed. However, it could also reflect differences in rearing conditions or genuine variation between geographic populations of *H. melpomene*. Further work will be needed to confirm the nature and extent of geographic and individual variation in pheromone composition.

Females exhibited a strong preference for males which did not have their androconia blocked. This suggests that, as in other butterfly systems (Costanzo & Monteiro, 2007), female *Heliconius* are actively involved in mating decisions. Nonetheless, there were no consistent differences in the female behaviours we recorded in our experiments. It is possible that the important female preference behaviours are subtle and were missed in our study. Alternatively, female acceptance of a male may instead simply represent a decision to stop rejection behaviours, and therefore not be associated with any particular characteristic behavioural response.

It remains unclear which compounds are biologically active and exactly what information is being conveyed. The signal clearly influences female mating decisions, and these compounds may convey complex information about male species identity, quality, age etc. that are interpreted by females. It is also unknown whether females, like males, use visual cues in courtship. The use of multiple signals is common in animal communication (Candolin, 2003). Whilst butterflies primarily use visual cues to locate mates (Kemp & Rutowski, 2011), it has



been shown in *B. anynana* that in addition to visual cues, chemical cues also play a role and are equally important in sexual selection by female choice (Costanzo & Monteiro, 2007). Our work establishes the potential for similar multimodal signalling in *Heliconius* butterflies.

This study provides evidence for the importance of pheromones in intraspecific mate choice in *Heliconius* butterflies. Evolution of cues within populations could lead to reproductive isolation between populations if both cues, and their corresponding preferences, diverge (Ptacek, 2000). In other butterflies, male wing compounds contribute to reproductive isolation between closely related species (Grula, McChesney & Taylor, 1980; Phelan & Baker, 1987; Bacquet et al., 2015). Evidence suggests that strong pre-mating barriers in addition to mate preference based on colour wing pattern exist between *Heliconius cydno* and *H. melpomene* (that differ in colour pattern) and between the latter and *H. timareta* (that are mimetic) (Mérot et al., 2017). For example, *H. cydno* males show a preference for their own pattern over that of the closely related *H. melpomene*, but will court wing pattern models of *H. melpomene*. *Heliconius cydno* males, however, have virtually never been observed mating with *H. melpomene* females (Naisbit, Jiggins & Mallet, 2001). On the other hand, although males of the mimetic *H. timareta florenciae* and *H. melpomene malleti* equally court female wing models of both species, interspecific matings occur in very low frequency (Sánchez et al., 2015; Mérot et al., 2017). Furthermore, male androconial compounds differ between species (Mérot et al., 2015; Mann et al., unpublished data), suggesting that they could play role in reproductive isolation. Future work will allow us to explore the multidimensional aspect of speciation by understanding both male and female choice, and the role that multiple modes of signalling could play in reproductive isolation.

## Acknowledgments

We acknowledge the support of Caroline Nieberding and Christer Löfstedt who provided early encouragement to pursue this project, and Kelsey Byers who gave useful advice on data analysis and manuscript preparation. We thank our team at the insectaries in Panama, including Oscar Paneso, Sylvia Fernanda Garza Reyes and Rachel Crisp. We also thank Oscar Penagos for his technical support breeding butterflies at insectaries in La Vega, Colombia.

# References

- Ando T., Inomata S., Yamamoto M. 2004. Lepidopteran Sex Pheromones. In: Schulz S ed. *The Chemistry of Pheromones and Other Semiochemicals I*. Topics in Current Chemistry. Springer Berlin Heidelberg, 51–96. DOI: 10.1007/b95449.
- Bacquet PMB., Brattström O., Wang H-L., Allen CE., Löfstedt C., Brakefield PM., Nieberding CM. 2015. Selection on male sex pheromone composition contributes to butterfly reproductive isolation. *Proceedings of the Royal Society of London B: Biological Sciences* 282:20142734. DOI: 10.1098/rspb.2014.2734.
- Barth R. 1952. Os órgãos odoríferos masculinos de alguns Heliconiinae do Brasil. *Memórias do Instituto Oswaldo Cruz* 50:355–367. DOI: 10.1590/S0074-02761953000100006.
- Bates HW. 1862. Contributions to an insect fauna of the Amazon valley. Lepidoptera: Heliconidae. *Transactions of the Linnean Society of London* 23:495–566. DOI: 10.1111/j.1095-8312.1981.tb01842.x.
- Becker HG., Beckert R. 1993. *Organikum-Organisch-Chemisches Praktikum*. Wiley-VCH Weinheim.
- van Bergen E., Brakefield PM., Heuskin S., Zwaan BJ., Nieberding CM. 2013. The scent of inbreeding: a male sex pheromone betrays inbred males. *Proceedings of the Royal Society of London B: Biological Sciences* 280:20130102. DOI: 10.1098/rspb.2013.0102.
- Bethenod M-T., Thomas Y., Rousset F., Frérot B., Pélozuelo L., Genestier G., Bourguet D. 2004. Genetic isolation between two sympatric host plant races of the European corn borer, *Ostrinia nubilalis* Hübner. II: assortative mating and host-plant preferences for oviposition. *Heredity* 94:264–270. DOI: 10.1038/sj.hdy.6800611.

458 Boggs CL. 1981. Selection Pressures Affecting Male Nutrient Investment at Mating in  
459 Heliconiine Butterflies. *Evolution* 35:931. DOI: 10.2307/2407864.

460 Boggs C., Gilbert LE. 1979. Male contribution to egg production in butterflies: evidence for  
461 transfer of nutrients at mating. *Science* 206:83–84. DOI:  
462 10.1126/science.206.4414.83.

463 Brower LP., Jones MA. 1965. Precourtship interaction of wing and abdominal sex glands in  
464 male Danaus butterflies. *Proceedings of the Royal Entomological Society of London.*  
465 *Series A, General Entomology* 40:147–151. DOI: 10.1111/j.1365-  
466 3032.1965.tb00302.x.

467 Brown KS. 1981. The Biology of Heliconius and Related Genera. *Annual Review of*  
468 *Entomology* 26:427–456. DOI: 10.1146/annurev.en.26.010181.002235.

469 Buser HR., Arn H., Guerin P., Rauscher S. 1983. Determination of double bond position in  
470 mono-unsaturated acetates by mass spectrometry of dimethyl disulfide adducts.  
471 *Analytical Chemistry* 55:818–822. DOI: 10.1021/ac00257a003.

472 Candolin U. 2003. The use of multiple cues in mate choice. *Biological Reviews* 78:575–595.  
473 DOI: 10.1017/S1464793103006158.

474 Costanzo K., Monteiro A. 2007. The use of chemical and visual cues in female choice in the  
475 butterfly *Bicyclus anynana*. *Proceedings of the Royal Society B: Biological Sciences*  
476 274:845–851. DOI: 10.1098/rspb.2006.3729.

477 Crane J. 1955. Imaginal behaviour of a Trinidad butterfly, *Heliconius erato hydara*  
478 Hewitson, with special reference to the social use of color. *Zoologica, New York*  
479 40:167–196.

- Danci A., Schaefer PW., Schopf A., Gries G. 2006. Species-specific close-range sexual communication systems prevent cross-attraction in three species of Glyptapanteles parasitic wasps (Hymenoptera: Braconidae). *Biological Control* 39:225–231. DOI: 10.1016/j.biocontrol.2006.07.009.
- Dinno A. 2017. dunn.test: Dunn’s Test of Multiple Comparisons Using Rank Sums. R package version 1.3.4. <https://CRAN.R-project.org/package=dunn.test>.
- Dorai-Raj S. 2014. binom: Binomial Confidence Intervals For Several Parameterizations. R package version 1.1-1. <https://CRAN.R-project.org/package=binom>.
- Dray S., Dufour AB. 2007. The ade4 package: implementing the duality diagram for ecologists. *Journal of Statistical Software* 22:1–20. DOI: 10.18637/jss.v022.i04.
- Dussourd DE., Harvis CA., Meinwald J., Eisner T. 1991. Pheromonal advertisement of a nuptial gift by a male moth (*Utetheisa ornatrix*). *Proceedings of the National Academy of Sciences of the United States of America* 88:9224–9227. DOI: 10.1073/pnas.88.20.9224.
- Eggert A-K., Müller JK. 1997. Biparental care and social evolution in burying beetles: lessons from the larder. In: Choe JC, Crespi BJ eds. *The Evolution of Social Behavior in Insects and Arachnids*. Cambridge: Cambridge University Press, 216–236.
- Emsley MG. 1963. A morphological study of imagine Heliconiinae (Lep., Nymphalidae) with a consideration of the evolutionary relationships within the group. *Zoologica, New York* 48:85–130.
- Estrada C., Gilbert LE. 2010. Host plants and immatures as mate-searching cues in Heliconius butterflies. *Animal Behaviour* 80:231–239. DOI: 10.1016/j.anbehav.2010.04.023.

503 Estrada C., Jiggins CD. 2008. Interspecific sexual attraction because of convergence in  
504 warning colouration: is there a conflict between natural and sexual selection in  
505 mimetic species? *Journal of Evolutionary Biology* 21:749–60. DOI: 10.1111/j.1420-  
506 9101.2008.01517.x.

507 Estrada C., Schulz S., Yildizhan S., Gilbert LE. 2011. Sexual selection drives the evolution of  
508 antiaphrodisiac pheromones in butterflies. *Evolution; international journal of*  
509 *organic evolution* 65:2843–2854. DOI: 10.1111/j.1558-5646.2011.01352.x.

510 Estrada C., Yildizhan S., Schulz S., Gilbert LE. 2010. Sex-specific chemical cues from  
511 immatures facilitate the evolution of mate guarding in *Heliconius* butterflies.  
512 *Proceedings of The Royal Society. Biological Sciences* 277:407–413. DOI:  
513 10.1098/rspb.2009.1476.

514 Finkbeiner SD., Briscoe AD., Reed RD. 2014. Warning signals are seductive: Relative  
515 contributions of color and pattern to predator avoidance and mate attraction in  
516 *Heliconius* butterflies. *Evolution* 68:3410–3420. DOI: 10.1111/evo.12524.

517 Fox J., Weisberg S. 2011. *An {R} Companion to Applied Regression*. Thousand Oaks, CA: Sage.

518 Gilbert LE. 1976. Postmating female odor in *Heliconius* butterflies: a male-contributed  
519 antiaphrodisiac? *Science* 193:419–420. DOI: 10.1126/science.935877.

520 Giraldo N., Salazar C., Jiggins CD., Bermingham E., Linares M. 2008. Two sisters in the same  
521 dress: *Heliconius* cryptic species. *BMC Evolutionary Biology* 8:324. DOI:  
522 10.1186/1471-2148-8-324.

523 Grillet M., Dartevelle L., Ferveur J-F. 2006. A *Drosophila* male pheromone affects female  
524 sexual receptivity. *Proceedings of the Royal Society B: Biological Sciences* 273:315–  
525 323. DOI: 10.1098/rspb.2005.3332.

526 Grillet M., Everaerts C., Houot B., Ritchie MG., Cobb M., Ferveur J-F. 2012. Incipient  
527 speciation in *Drosophila melanogaster* involves chemical signals. *Scientific Reports*  
528 2. DOI: 10.1038/srep00224.

529 Grula JW., McChesney JD., Taylor OR. 1980. Aphrodisiac pheromones of the sulfur  
530 butterflies *Colias eurytheme* and *C. Philodice* (Lepidoptera, Pieridae). *Journal of*  
531 *Chemical Ecology* 6:241–256. DOI: 10.1007/BF00987543.

532 Jiggins CD. 2008. Ecological Speciation in Mimetic Butterflies. *BioScience* 58:541–548. DOI:  
533 10.1641/B580610.

534 Jiggins CD., Estrada C., Rodrigues A. 2004. Mimicry and the evolution of premating isolation  
535 in *Heliconius melpomene* Linnaeus. *Journal of Evolutionary Biology* 17:680–691.  
536 DOI: 10.1111/j.1420-9101.2004.00675.x.

537 Jiggins CD., Naisbit RE., Coe RL., Mallet J. 2001. Reproductive isolation caused by colour  
538 pattern mimicry. *Nature* 411:302–305. DOI: 10.1038/35077075.

539 Johansson BG., Jones TM. 2007. The role of chemical communication in mate choice.  
540 *Biological Reviews* 82:265–289. DOI: 10.1111/j.1469-185X.2007.00009.x.

541 Kemp DJ., Rutowski RL. 2011. The Role of Coloration in Mate Choice and Sexual  
542 Interactions in Butterflies. In: *Advances in the Study of Behavior*. Elsevier, 55–92.

543 Klein AL., Araújo AM de. 2010. Courtship behavior of *Heliconius erato phyllis* (Lepidoptera,  
544 Nymphalidae) towards virgin and mated females: conflict between attraction and  
545 repulsion signals? *Journal of Ethology* 28:409–420. DOI: 10.1007/s10164-010-0209-  
546 1.

547 Kock D., Ruther J., Sauer KP. 2007. A Male Sex Pheromone in a Scorpionfly. *Journal of*  
548 *Chemical Ecology* 33:1249–1256. DOI: 10.1007/s10886-007-9304-3.

549 Kronforst MR., Young LG., Kapan DD., McNeely C., O'Neill RJ., Gilbert LE. 2006. Linkage of  
550 butterfly mate preference and wing color preference cue at the genomic location of  
551 wingless. *Proceedings of the National Academy of Sciences* 103:6575–6580. DOI:  
552 10.1073/pnas.0509685103.

553 Lassance J-M., Groot AT., Liénard MA., Antony B., Borgwardt C., Andersson F., Hedenström  
554 E., Heckel DG., Löfstedt C. 2010. Allelic variation in a fatty-acyl reductase gene  
555 causes divergence in moth sex pheromones. *Nature* 466:486–489. DOI:  
556 10.1038/nature09058.

557 Löfstedt C. 1993. Moth Pheromone Genetics and Evolution. *Philosophical Transactions of*  
558 *the Royal Society of London B: Biological Sciences* 340:167–177. DOI:  
559 10.1098/rstb.1993.0055.

560 Mallet J. 1986. Gregarious roosting and home range in *Heliconius* butterflies. *National*  
561 *Geographic Research* 2:198–215.

562 Mas F., Jallon J-M. 2005. Sexual Isolation and Cuticular Hydrocarbon Differences between  
563 *Drosophila santomea* and *Drosophila yakuba*. *Journal of Chemical Ecology* 31:2747–  
564 2752. DOI: 10.1007/s10886-005-7570-5.

565 Meinwald J., Meinwald YC., Mazzocchi PH. 1969. Sex Pheromone of the Queen Butterfly:  
566 Chemistry. *Science* 164:1174–1175. DOI: 10.1126/science.164.3884.1174.

567 Melo MC., Salazar C., Jiggins CD., Linares M. 2009. Assortative Mating Preferences Among  
568 Hybrids Offers a Route to Hybrid Speciation. *Evolution* 63:1660–1665. DOI:  
569 10.1111/j.1558-5646.2009.00633.x.

570 Menzel F., Radke R., Foitzik S. 2016. Odor diversity decreases with inbreeding in the ant  
571 *Hypoconera opacior*. *Evolution* 70:2573–2582. DOI: 10.1111/evo.13068.



572 Mérot C., Frérot B., Leppik E., Joron M. 2015. Beyond magic traits: Multimodal mating cues  
573 in *Heliconius* butterflies. *Evolution* 69:2891–2904. DOI: 10.1111/evo.12789.

574 Mérot C., Salazar C., Merrill RM., Jiggins CD., Joron M. 2017. What shapes the continuum of  
575 reproductive isolation? Lessons from *Heliconius* butterflies. *bioRxiv*:107011.

576 Merrill RM., Chia A., Nadeau NJ. 2014. Divergent warning patterns contribute to assortative  
577 mating between incipient *Heliconius* species. *Ecology and Evolution* 4:911–917. DOI:  
578 10.1002/ece3.996.

579 Merrill RM., Dasmahapatra KK., Davey JW., Dell’Aglia DD., Hanly JJ., Huber B., Jiggins CD.,  
580 Joron M., Kozak KM., Llaurens V., Martin SH., Montgomery SH., Morris J., Nadeau NJ.,  
581 Pinharanda AL., Rosser N., Thompson MJ., Vanjari S., Wallbank RWR., Yu Q. 2015.  
582 The diversification of *Heliconius* butterflies: what have we learned in 150 years?  
583 *Journal of Evolutionary Biology* 28:1417–1438. DOI: 10.1111/jeb.12672.

584 Merrill RM., Gompert Z., Dembeck LM., Kronforst MR., McMillan WO., Jiggins CD. 2011a.  
585 Mate preference across the speciation continuum in a clade of mimetic butterflies.  
586 *Evolution* 65:1489–1500. DOI: 10.1111/j.1558-5646.2010.01216.x.

587 Merrill RM., Van Schooten B., Scott JA., Jiggins CD. 2011b. Pervasive genetic associations  
588 between traits causing reproductive isolation in *Heliconius* butterflies. *Proceedings*  
589 *of the Royal Society B: Biological Sciences* 278:511–518. DOI:  
590 10.1098/rspb.2010.1493.

591 More JD., Finney NS. 2002. A Simple and Advantageous Protocol for the Oxidation of  
592 Alcohols with o-Iodoxybenzoic Acid (IBX). *Organic Letters* 4:3001–3003. DOI:  
593 10.1021/ol026427n.

594 Müller F. 1912. X. The Scent-scales of the Male “Maracujá butterflies.” In: Longstaff GB ed.  
595 *Butterfly Hunting in Many Lands*. New York: Longmans, Green & Co., 655–659.

596 Muñoz AG., Salazar C., Castaño J., Jiggins CD., Linares M. 2010. Multiple sources of  
597 reproductive isolation in a bimodal butterfly hybrid zone. *Journal of Evolutionary*  
598 *Biology* 23:1312–1320. DOI: 10.1111/j.1420-9101.2010.02001.x.

599 Naisbit RE., Jiggins CD., Mallet J. 2001. Disruptive sexual selection against hybrids  
600 contributes to speciation between *Heliconius cydno* and *Heliconius melpomene*.  
601 *Proceedings of the Royal Society of London Series B-Biological Sciences* 268:1849–  
602 1854. DOI: 10.1098/rspb.2001.1753.

603 Nieberding CM., Fischer K., Saastamoinen M., Allen CE., Wallin EA., Hedenström E.,  
604 Brakefield PM. 2012. Cracking the olfactory code of a butterfly: the scent of ageing.  
605 *Ecology Letters* 15:415–424. DOI: 10.1111/j.1461-0248.2012.01748.x.

606 Nieberding CM., de Vos H., Schneider MV., Lassance J-M., Estramil N., Andersson J., Bång J.,  
607 Hedenström E., Löfstedt C., Brakefield PM. 2008. The Male Sex Pheromone of the  
608 Butterfly *Bicyclus anynana*: Towards an Evolutionary Analysis. *PLoS ONE* 3:e2751.  
609 DOI: 10.1371/journal.pone.0002751.

610 Nishida R., Schulz S., Kim CS., Fukami H., Kuwahara Y., Honda K., Hayashi N. 1996. Male sex  
611 pheromone of a giant danaine butterfly, *Idea leuconoe*. *Journal of Chemical Ecology*  
612 22:949–972. DOI: 10.1007/BF02029947.

613 Ogle DH. 2017. FSA: Fisheries Stock Analysis. R package version 0.8.13. [https://CRAN.R-](https://CRAN.R-project.org/package=FSA)  
614 [project.org/package=FSA](https://CRAN.R-project.org/package=FSA).

615 Oksanen J., Guillaume Blanchet F., Friendly M., Kindt R., Legendre P., McGlinn D., Minchin P.,  
616 O’Hara R., Simpson G., Solymos P., Stevens H., Szoecs E., Wagner H. 2017. vegan:

Community Ecology Package. R package version 2.4-2. <https://CRAN.R-project.org/package=vegan>.

Phelan PL., Baker TC. 1987. Evolution of male pheromones in moths: reproductive isolation through sexual selection? *Science (New York, N.Y.)* 235:205–207. DOI: 10.1126/science.235.4785.205.

Pliske TE., Eisner T. 1969. Sex Pheromone of the Queen Butterfly: Biology. *Science* 164:1170–1172. DOI: 10.1126/science.164.3884.1170.

Ptacek M. 2000. The role of mating preferences in shaping interspecific divergence in mating signals in vertebrates. *Behavioural Processes* 51:111–134. DOI: 10.1016/S0376-6357(00)00123-6.

R Core Team 2016. *R: A language and environment for statistical computing*. Vienna, Austria: R Foundation for Statistical Computing.

Ruther J., Matschke M., Garbe L-A., Steiner S. 2009. Quantity matters: male sex pheromone signals mate quality in the parasitic wasp *Nasonia vitripennis*. *Proceedings of the Royal Society B: Biological Sciences* 276:3303–3310. DOI: 10.1098/rspb.2009.0738.

Sánchez AP., Pardo-Díaz C., Enciso-Romero J., Muñoz AG., Jiggins CD., Salazar C., Linares M. 2015. An introgressed wing pattern acts as a mating cue. *Evolution; International Journal of Organic Evolution* 69:1619–1629. DOI: 10.1111/evo.12679.

Saveer AM., Becher PG., Birgersson G., Hansson BS., Witzgall P., Bengtsson M. 2014. Mate recognition and reproductive isolation in the sibling species *Spodoptera littoralis* and *Spodoptera litura*. *Chemical Ecology* 2:18. DOI: 10.3389/fevo.2014.00018.

638 Schulz S., Estrada C., Yildizhan S., Boppré M., Gilbert LE. 2008. An Antiaphrodisiac in  
639 *Heliconius melpomene* Butterflies. *Journal of Chemical Ecology* 34:82–93. DOI:  
640 10.1007/s10886-007-9393-z.

641 Smadja CM., Butlin RK. 2008. On the scent of speciation: the chemosensory system and its  
642 role in premating isolation. *Heredity* 102:77–97. DOI: 10.1038/hdy.2008.55.

643 Supple M., Papa R., Counterman B., McMillan WO. 2014. The genomics of an adaptive  
644 radiation: insights across the *Heliconius* speciation continuum. *Advances in*  
645 *experimental medicine and biology* 781:249–271. DOI: 10.1007/978-94-007-7347-  
646 9\_13.

647 Symonds MRE., Johnson TL., Elgar MA. 2012. Pheromone production, male abundance,  
648 body size, and the evolution of elaborate antennae in moths. *Ecology and Evolution*  
649 2:227–246. DOI: 10.1002/ece3.81.

650 Vane-Wright RI., Boppré M. 1993. Visual and Chemical Signalling in Butterflies: Functional  
651 and Phylogenetic Perspectives. *Philosophical Transactions of the Royal Society of*  
652 *London B: Biological Sciences* 340:197–205. DOI: 10.1098/rstb.1993.0058.

653 Walters JR., Stafford C., Hardcastle TJ., Jiggins CD. 2012. Evaluating female remating rates in  
654 light of spermatophore degradation in *Heliconius* butterflies: pupal-mating  
655 monandry versus adult-mating polyandry. *Ecological Entomology* 37:257–268. DOI:  
656 10.1111/j.1365-2311.2012.01360.x.

657 Wicker-Thomas C. 2011. Evolution of insect pheromones and their role in reproductive  
658 isolation and speciation. *Annales de la Société entomologique de France (N.S.)* 47:55–  
659 62. DOI: 10.1080/00379271.2011.10697696.

660 Wickham H. 2009. *ggplot2: Elegant Graphics for Data Analysis*. Springer-Verlag new York.

Wyatt TD. 2003. *Pheromones and Animal Behaviour: Communication by Smell and Taste*.

Cambridge University Press.

Wyatt TD. 2014. *Pheromones and Animal Behavior: Chemical Signals and Signatures*.

Cambridge University Press.

Yildizhan S., van Loon J., Sramkova A., Ayasse M., Arsene C., ten Broeke C., Schulz S. 2009.

Aphrodisiac Pheromones from the Wings of the Small Cabbage White and Large

Cabbage White Butterflies, *Pieris rapae* and *Pieris brassicae*. *ChemBioChem* 10:1666–

1677. DOI: 10.1002/cbic.200900183.

Figure 1. A) *H. melpomene malleti* (Ecuador sample, left) and *H. melpomene plesseni* (Ecuador sample, right). B) Dissected wings from specimens of *H. melpomene plesseni* showing sexual dimorphism in the androconial region, with male (left) and female (right). For each sex, the left set of wings shows the ventral surface and the right set the dorsal surface. C) Expanded view of the male androconial region with arrow highlighting the vein Sc+R<sub>1</sub>. The ventral side of the forewing is on the top and the dorsal side of the hindwing is on the bottom. The pale grey-brown region in the male wing was dissected for chemical analysis.

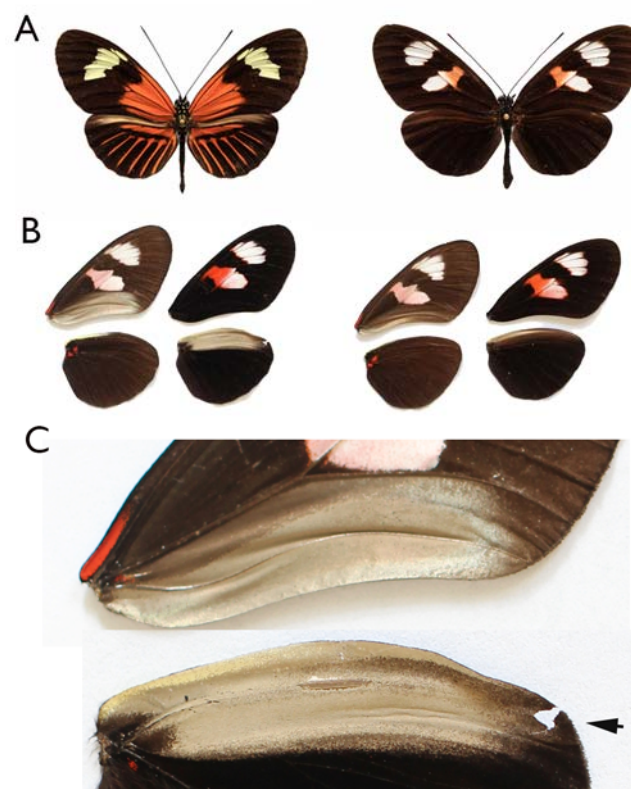

Figure 2: SEM image of putative androconial scales of *H. melpomene*. Scales in the region of the hindwing vein Sc+R<sub>1</sub> and forewing vein 1A are shown. A) male hindwing; B) male forewing and; C) female hindwing at 500x magnification. d) Magnified view of brush-like structures of the special scales in the male hindwing androconial region. Scale bars indicate 50  $\mu$ m (A-C) and 2  $\mu$ m (D).

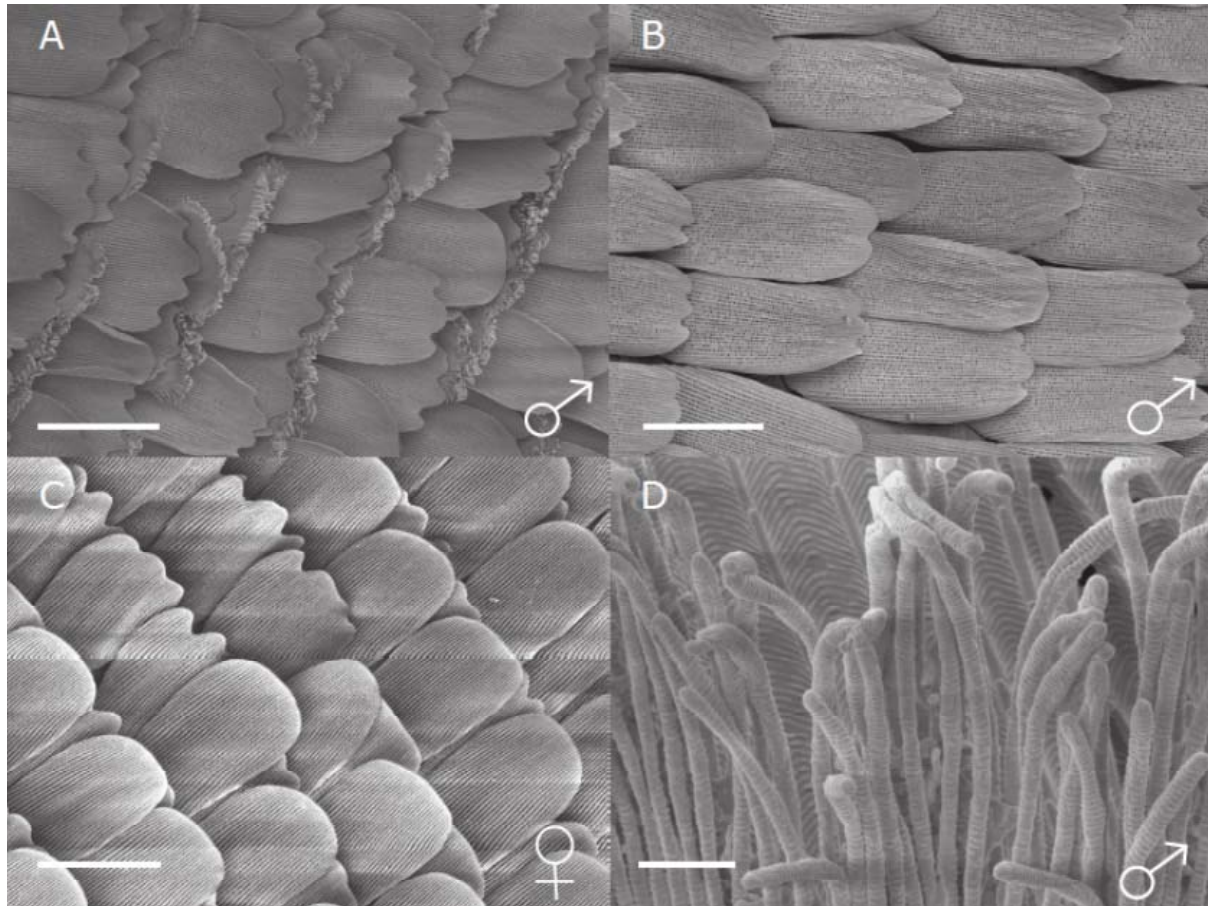



Figure 3: SEM image of the base of a scale of hindwing androconia of *H. melpomene*. A) Scale from androconial region of female. B) Scale from androconial region of male with brush-like structures; the arrow highlights the bulge in the scale base in this region. Scale bars indicate 10  $\mu\text{m}$ .

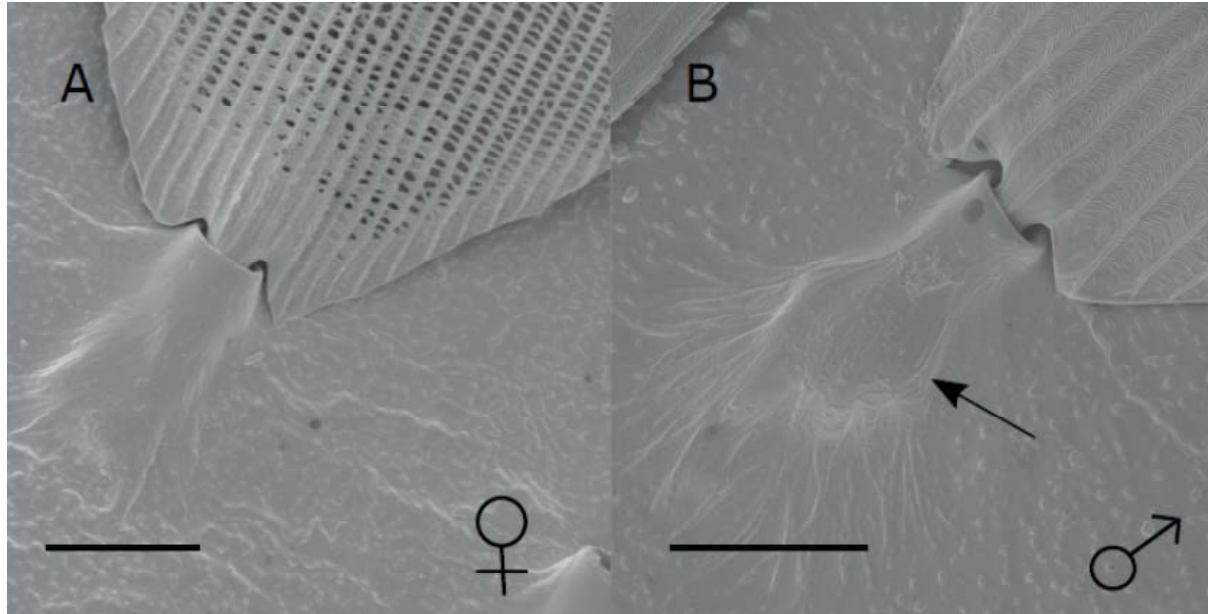

Figure 4: Regional differences in male androconial extracts. Total ion chromatograms of extracts from the androconial region of an Ecuadorian *H. melpomene* and a Panamanian *H. melpomene rosina* male hindwing. 1: syringaldehyde; 2: (Z)-9-octadecenal; 3: octadecanal; 4: methyloctadecanals; 5: 1-octadecanol; 6: heneicosane; 7: methyloctadecan-1-ols and nonadecanal; 8: (Z)-11-icosenal; 9: icosanal; 10: (Z)-11-icosenol; 11: tricosane; 12: (Z)-13-docosenal. All peaks eluting later than 44 min are cuticular compounds consisting of larger *n*-alkanes, 2,5-dialkyltetrahydrofurans, cholesterol or are contaminations. IS, internal standard.

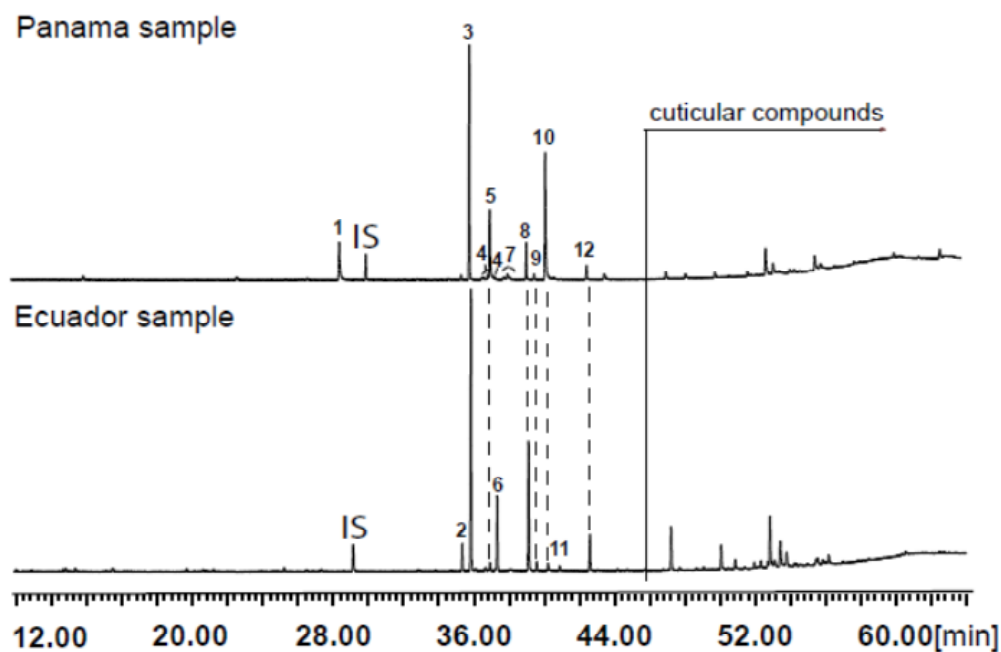

Figure 5: Compounds detected by GC/MS of *H. melpomene* (Ecuador samples) wing extracts. A) Presence of compounds in different wing regions of five males (10 days post-eclosion). B) Presence of compounds in five females (10 days post-eclosion), five young males (0 days post-eclosion) and five old males (10 days post-eclosion).

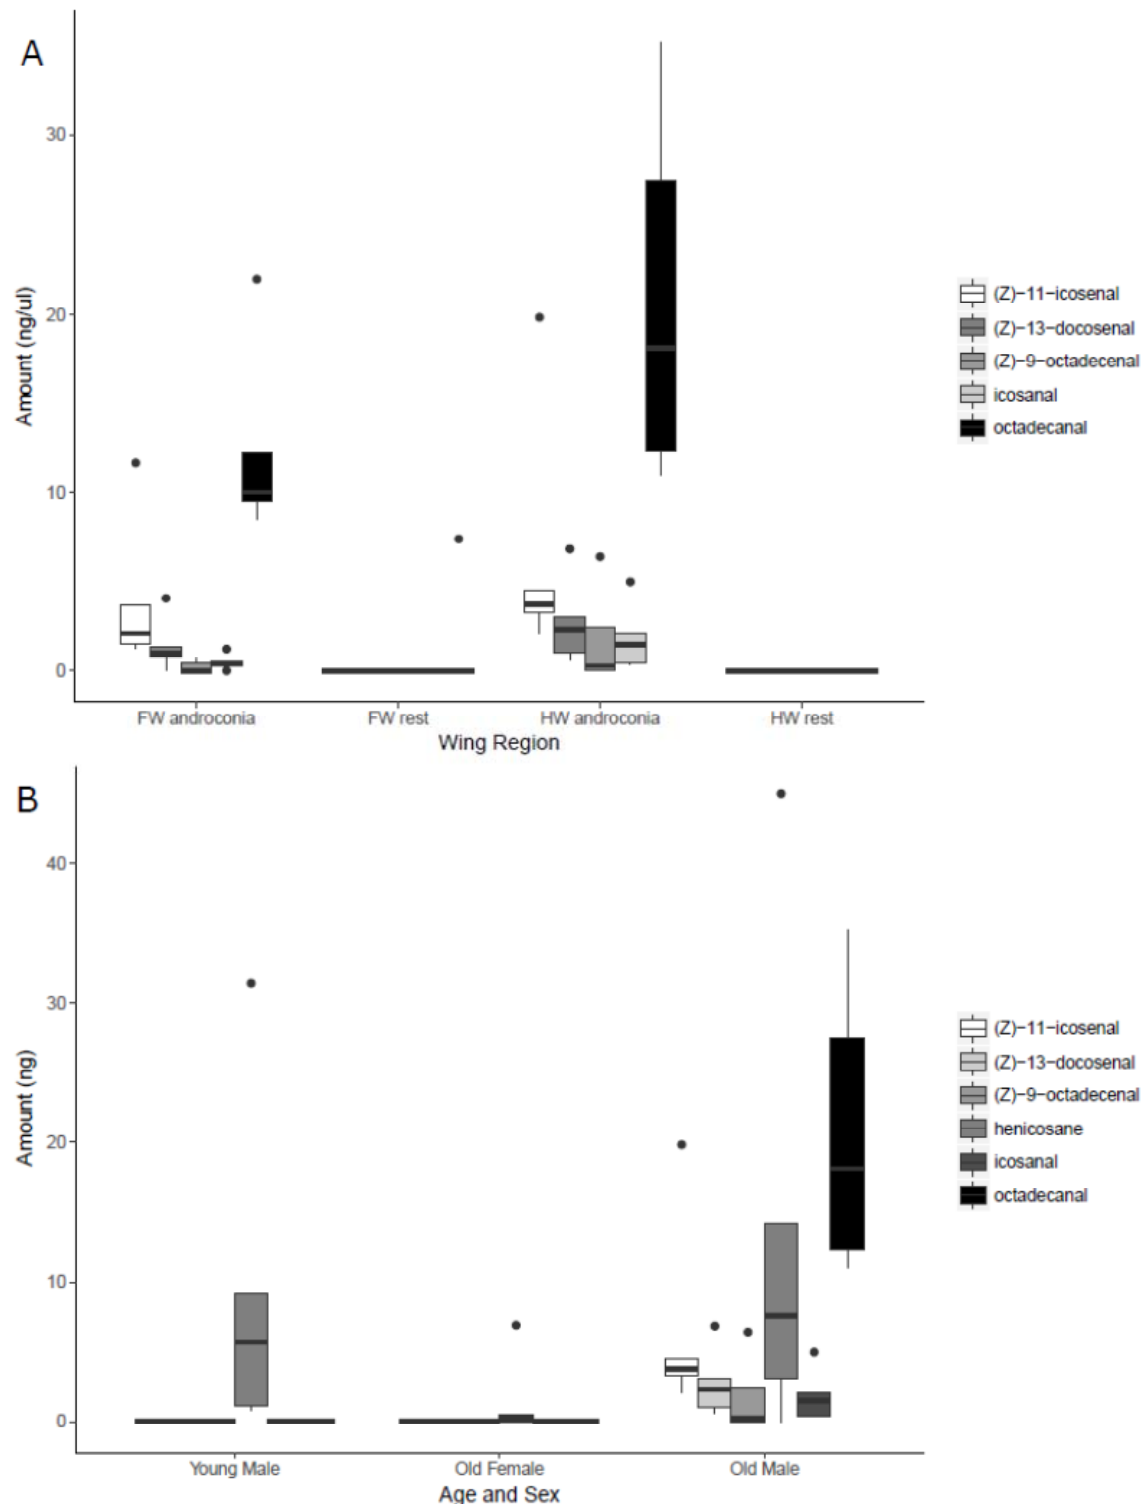

Table 1: Outcome of mate choice trials across different species/races. Proportion of successful copulations with the control male was tested using an exact binomial test. Females mated significantly more with the control male than the experimental (pheromone-blocked) male in all four populations. Statistical analysis based on females which mated.

| Species                      | Mated with control | Mated with experimental | Did not mate | p-value (Exact Binomial Test) |
|------------------------------|--------------------|-------------------------|--------------|-------------------------------|
| <i>H. melpomene rosina</i>   | 15                 | 0                       | 18           | <0.001                        |
| <i>H. erato demophoon</i>    | 14                 | 1                       | 31           | <0.001                        |
| <i>H. melpomene malleti</i>  | 19                 | 3                       | 8            | <0.001                        |
| <i>H. timareta florencia</i> | 16                 | 3                       | 5            | <0.01                         |
